# Supplementary material for: Synergistic Effect of Eugenol and Probiotic Lactobacillus Plantarum Zs2058 against Salmonella Infection in C57bl/6 Mice
Source: PubMed Central journal article supplement (PMC7352263; doi:10.3390/nu12061611), 2020-05-30
Supplement: nutrients-12-01611-s001.pdf [file nutrients-12-01611-s001.pdf]

Supplementary Material

# Synergistic effect of eugenol and probiotic *Lactobacillus plantarum* ZS2058 against *Salmonella* infection in C57BL/6 Mice

Fanfen Song<sup>1,2</sup>, Junsheng Liu<sup>1,2,3</sup>, Wenyu Zhao<sup>1,2</sup>, Hongxuan Huang<sup>1,2</sup>, Diangeng Hu<sup>1,2</sup>, Haiqin Chen<sup>1,2</sup>, Hao Zhang<sup>1,2,3</sup>, Wei Chen<sup>1,2,3,4</sup>, Zhennan Gu<sup>\*1,2</sup>

<sup>1</sup> State Key Laboratory of Food Science and Technology, Jiangnan University, Wuxi, Jiangsu 214122, P. R. China; 17851300257@163.com (F.S.); ljshmail@163.com (J.L.); zwyjiangnan@163.com (W.Z.); hhxhuang@hotmail.com (H.H.); 7160112050@vip.jiangnan.edu.cn (D.H.); haiqinchen@jiangnan.edu.cn (H.C.); zhanghao@jiangnan.edu.cn (H.Z.); weichen@jiangnan.edu.cn (W.C.); zhennangu@jiangnan.edu.cn (Z.G.)

<sup>2</sup> School of Food Science and Technology, Jiangnan University, Wuxi, Jiangsu 214122, P. R. China; 17851300257@163.com (F.S.); ljshmail@163.com (J.L.); zwyjiangnan@163.com (W.Z.); hhxhuang@hotmail.com (H.H.); 7160112050@vip.jiangnan.edu.cn (D.H.); haiqinchen@jiangnan.edu.cn (H.C.); zhanghao@jiangnan.edu.cn (H.Z.); weichen@jiangnan.edu.cn (W.C.); zhennangu@jiangnan.edu.cn (Z.G.)

<sup>3</sup> National Engineering Research Center for Functional Food, Jiangnan University, Wuxi, Jiangsu 214122, P. R. China; ljshmail@163.com (J.L.); zhanghao@jiangnan.edu.cn (H.Z.); weichen@jiangnan.edu.cn (W.C.)

<sup>4</sup> Beijing Innovation Centre of Food Nutrition and Human Health, Beijing Technology and Business University (BTBU), Beijing 100048, P. R. China; weichen@jiangnan.edu.cn (W.C.)

\* Correspondence: zhennangu@jiangnan.edu.cn; Tel.: +86-153-5800-0855

Received: 29 April 2020; Accepted: 27 May 2020; Published: 30 May 2020

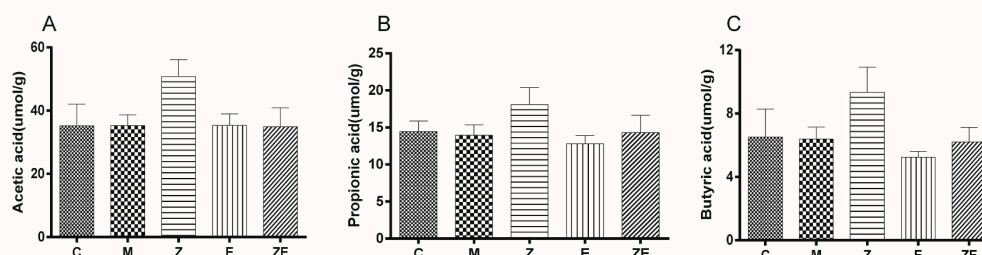

**Figure S1.** *Lactobacillus plantarum* ZS2058 increased the content of short chain fatty acids (SCFA) in mice feces. The level short chain fatty acids including acetic acid (A), propionic acid (B), and butyric acid (C) in feces of mice. Mice were pre-treated with regular diet and PBS (ST), regular diet and ZS2058 (Z), eugenol-contained diet and PBS (E), or eugenol-contained diet and ZS2058 (ZE) for 10 days. The control mice (C) were also pre-treated with regular diet and PBS but were not infected. Mice feces were then collected and Concentrations of SCFAs were measured as previously reported[1]. Briefly, feces were collected, freeze-dried and then weighed. Subsequently, the fecal matter was soaked in saturated sodium chloride and treated with aqueous sulfuric acid and diethyl ether for acidification and extraction, respectively. The SCFA analysis was performed via gas chromatography-mass spectrometry on a GCMS-QP2010 Ultra device (Shimadzu Co., Tokyo, Japan). Data are expressed as means  $\pm$  SEMs, n = 5.

**Table S1.** The coefficient drug interaction (CDI) of eugenol and *Lactobacillus plantarum* ZS2058 in inhibiting *Salmonella Typhimurium* SL1344 growth.

| Group | Parallel samples ( $\times 10^6$ CFU/mL)            |      |      |      |      |      | Mean |
|-------|-----------------------------------------------------|------|------|------|------|------|------|
| C     | 1170                                                | 1280 | 1200 | 1300 | 1300 | 1340 | 1265 |
| Z     | 720                                                 | 750  | 630  | 840  | 750  | 600  | 715  |
| E     | 265                                                 | 250  | 268  | 267  | 248  | 268  | 261  |
| ZE    | 130                                                 | 117  | 119  | 130  | 115  | 121  | 122  |
| CDI   | $(122/1265)/[(715/1265) \times (265/1265)] = 0.829$ |      |      |      |      |      |      |

To compare the antibacterial effect of ZS2058 and eugenol, ST were regularly cultured (C), co-cultured with eugenol (E), co-cultured with ZS2058 (Z), and co-cultured with ZS2058 and eugenol (ZE), the CFU values of ST were counted; ST, *Salmonella Typhimurium* SL1344; ZS2058, *Lactobacillus plantarum* ZS2058.

$$CDI = E_{ZE} / (E_Z \times E_e), \quad (1)$$

$E_x$  = the ST amount in group x / the ST amount in group C; there is a synergistic effect when  $CDI < 1$ ; E, effect; ZE, group ZE; Z, group Z; e, group E.

**Table S2.** The proximate composition of the closed formula Purified Diet.

| main nutrients            | The Purified Diet (g/kg) | Eugenol added diet (g/kg) |
|---------------------------|--------------------------|---------------------------|
| Water                     | $\leq 100$               | $\leq 100$                |
| Crude protein             | $\geq 220$               | $\geq 220$                |
| Crude fat                 | $\geq 40$                | $\geq 40$                 |
| Crude fibre               | $\leq 50$                | $\leq 50$                 |
| Crude ash                 | $\leq 80$                | $\leq 80$                 |
| Calcium                   | 10-18                    | 10-18                     |
| total phosphorus          | 6-12                     | 6-12                      |
| Calcium/ total phosphorus | 1.2/1.7/1                | 1.2/1.7/1                 |
| Lysine                    | $\geq 13.2$              | $\geq 13.2$               |
| Methionine + Cystine      | $\geq 7.8$               | $\geq 7.8$                |
| Eugenol                   | 0                        | 0.3                       |

**Table S3.** The drug interaction (CDI) of eugenol and *Lactobacillus plantarum* ZS2058 in inhibiting *Salmonella Typhimurium* SL1344 invasiveness.

| Group | Parallel samples ( $\times 10^3$ CFU/mL)                  |     |     |     |     |     | Mean  |
|-------|-----------------------------------------------------------|-----|-----|-----|-----|-----|-------|
| C     | 489                                                       | 448 | 421 | 397 | 449 | 384 | 431.3 |
| Z     | 202                                                       | 356 | 312 | 205 | 315 | 326 | 286.0 |
| E     | 143                                                       | 148 | 140 | 149 | 146 | 151 | 146.2 |
| ZE    | 34                                                        | 36  | 38  | 40  | 28  | 42  | 36.3  |
| CDI   | $(36.3/431.3)/[(286/431.3) \times (146.2/431.3)] = 0.373$ |     |     |     |     |     |       |

To evaluate the inhibitory effect of ZS2058 and eugenol on the virulence of ST, the HT-29 cells were co-cultured with regular ST (C), co-cultured with eugenol pretreated ST (E), co-cultured with ZS2058 and regular ST (Z), and co-cultured with ZS2058 and eugenol-pre-treated ST (ZE); ST, *Salmonella Typhimurium* SL1344; ZS2058, *Lactobacillus plantarum* ZS2058.

$$CDI = E_{ZE} / (E_Z \times E_e), \quad (1)$$

$E_x$  = the ST amount in group x / the ST amount in group C; there is a synergistic effect when  $CDI < 1$ ; E, effect; ZE, group ZE; Z, group Z; e, group E.

**Table S4.** Primers used for PCR or qPCR analysis.

| Gene     | Primers sequence (5'-3')                                    |
|----------|-------------------------------------------------------------|
| InvA     | F: CATTAACCTTGTGGAGCATATTCG<br>R: CATCCTCAACTTCAGCAGATAACC  |
| SopD     | F: GGACGCTTCTCAGACACAAT<br>R: CGGGACGCATCATCTCATAA          |
| AvrA     | F: TGTCCAGTTACGAAGCCACAAA<br>R: TCAATACCTGCCTTTCTGTAGCC     |
| HilA     | F: CGACTCATAACATTGGCGATACTT<br>R: CGGCAGTTCTTCGTAATGGT      |
| SsrB     | F: AAGGCTGTTTAGGTCAAATAGGGC<br>R: TCAAGGATAAGTATGTCAGGCTCGT |
| 16S rRNA | F: CGATGTCTACTTGGAGGTTGTG<br>R: CTCTGGAAAGTTCTGTGGATGTC     |

### References

1. Li, X.; Xu, Q.; Jiang, T.; Fang, S.; Wang, G.; Zhao, J.; Zhang, H.; Chen, W. A comparative study of the antidiabetic effects exerted by live and dead multi-strain probiotics in the type 2 diabetes model of mice. *Food Funct* **2016**, *7*, 4851-4860, doi:10.1039/c6fo01147k.
